# Supplementary material for: Identification of the WRKY gene family and functional analysis of two genes in Caragana intermedia
Source: PubMed Central journal article supplement (PMC5807834; doi:10.1186/s12870-018-1235-3), 2018-02-09

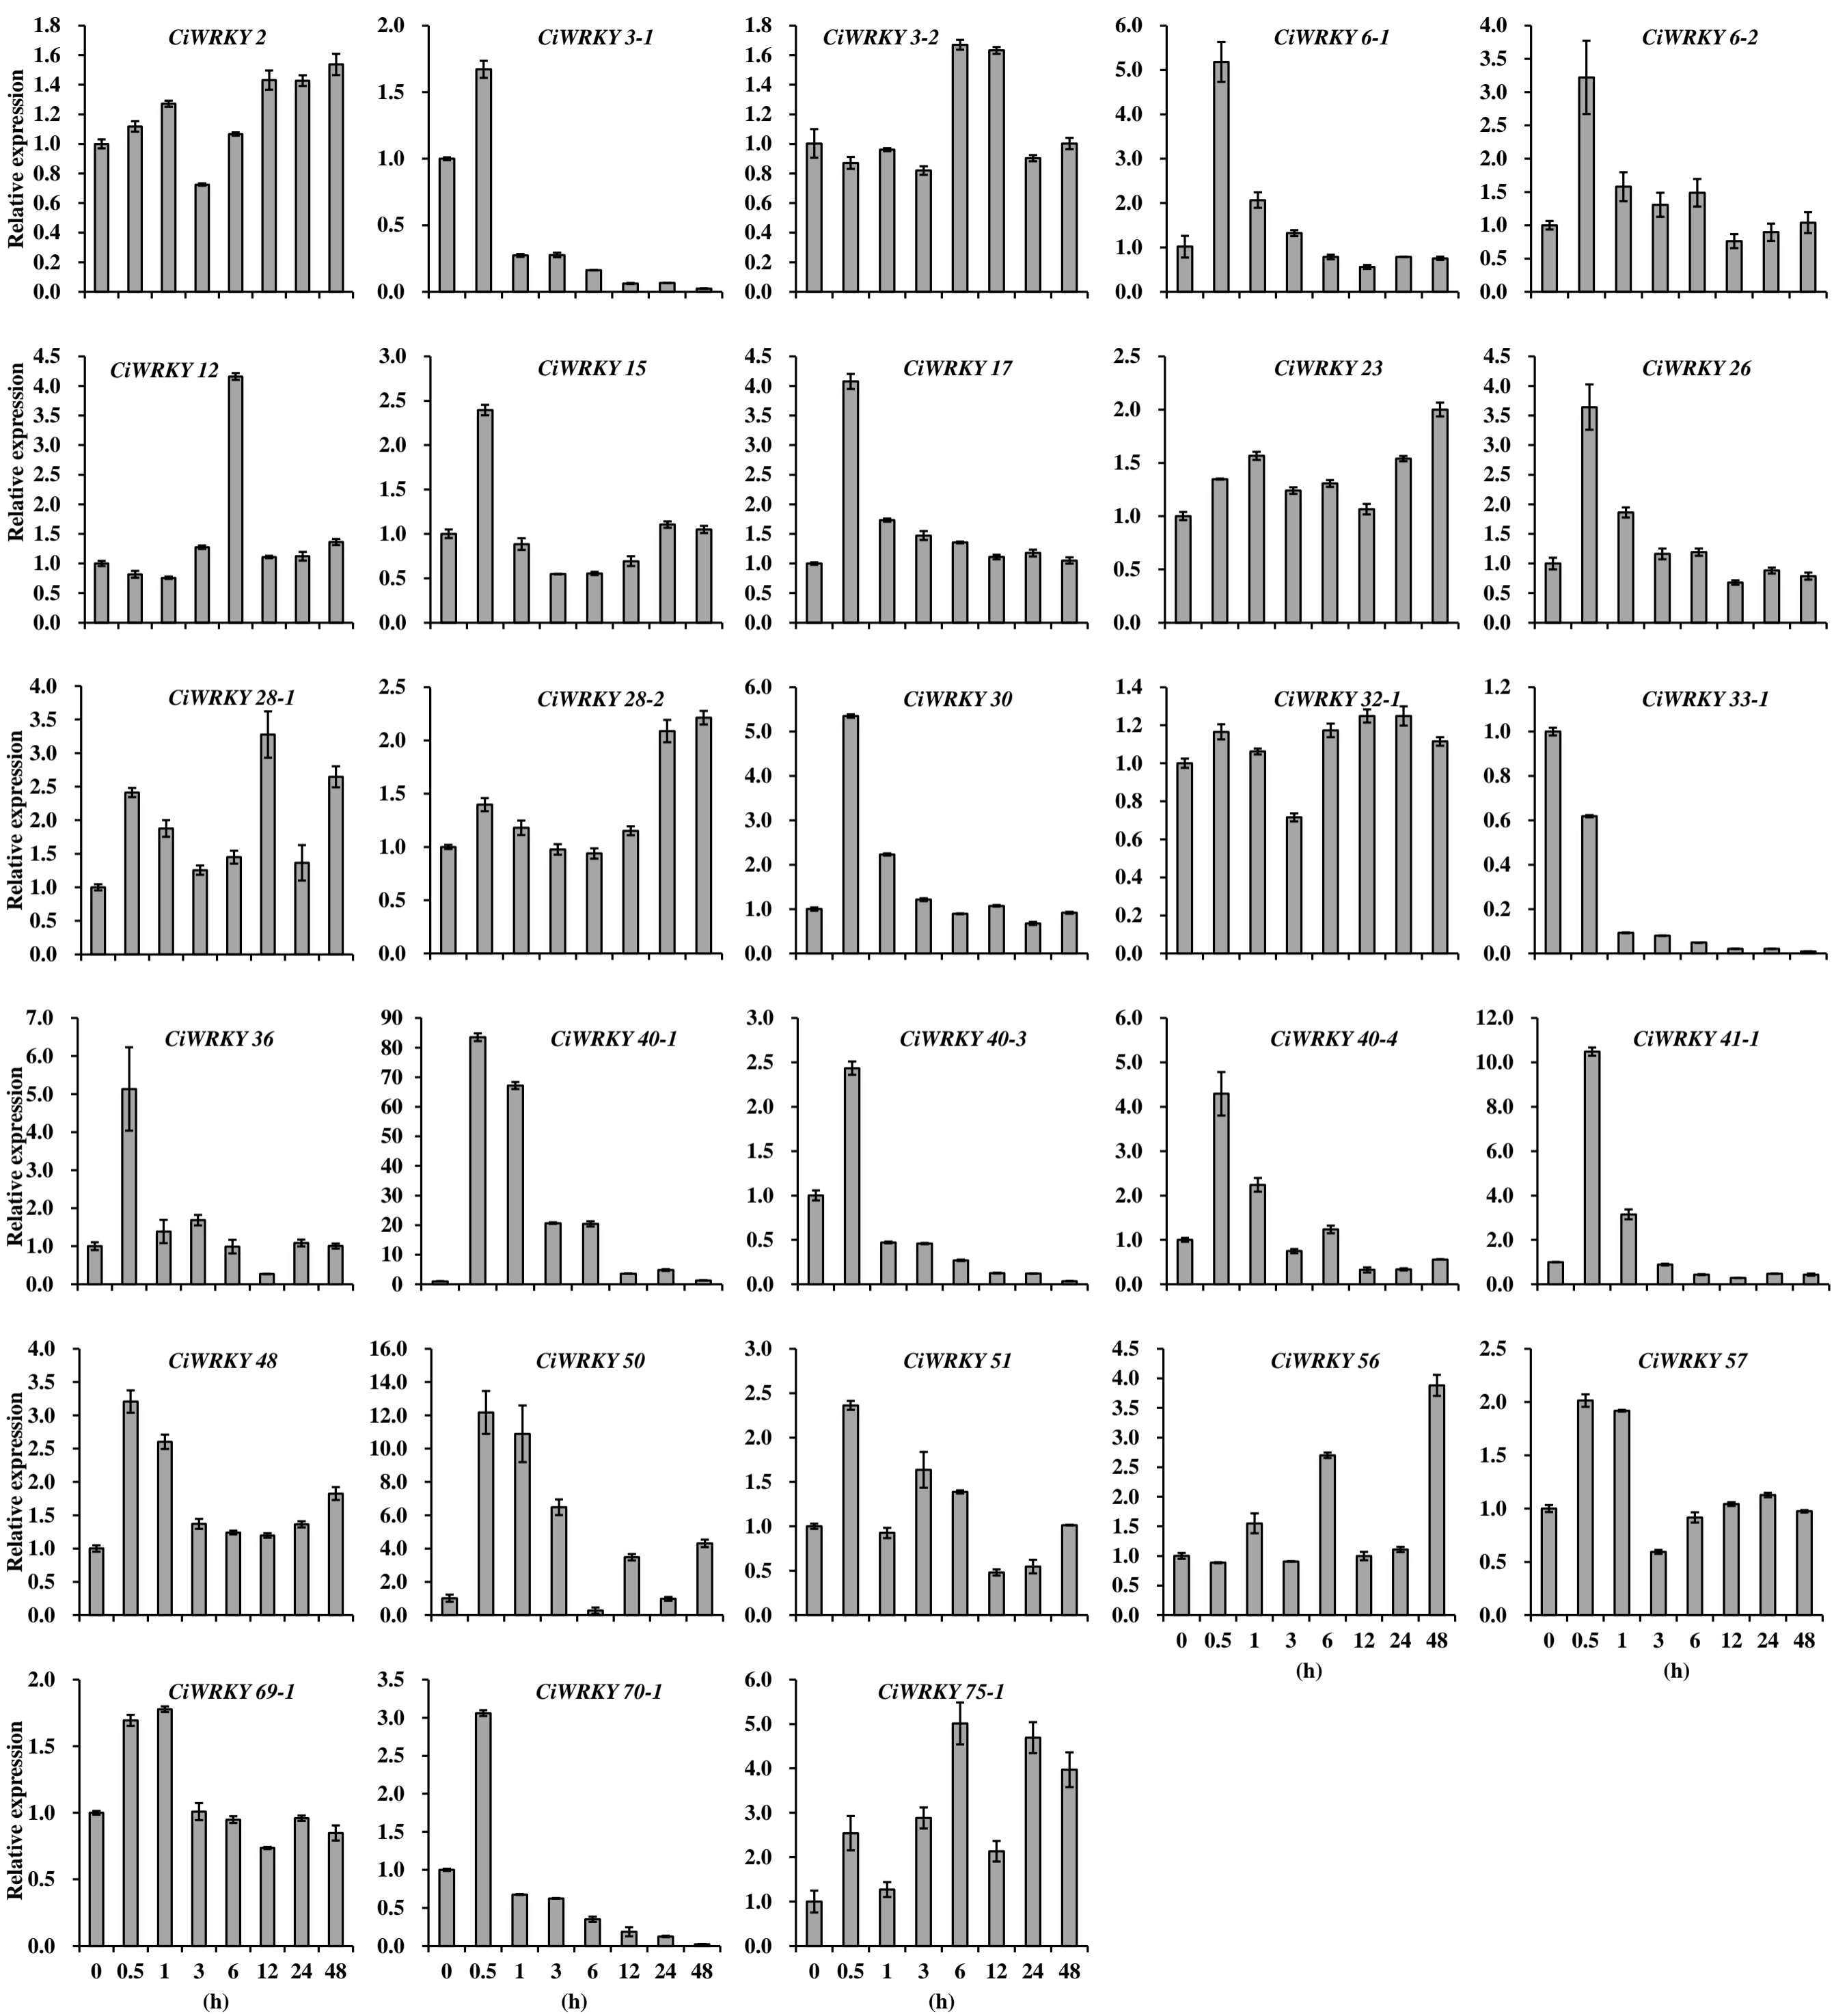

Supplement: 12870_2018_1235_MOESM4_ESM.pdf [file 12870_2018_1235_MOESM4_ESM.pdf]
